# Supplementary material for: Impact of uni- or multifocal perineural invasion in prostate cancer at radical prostatectomy
Source: PubMed Central journal article supplement — Transl Androl Urol. 2021 Jan;10(1):66–76. doi: 10.21037/tau-20-850 (PMC7844528; doi:10.21037/tau-20-850), 2021-01
Supplement: tau-10-01-66-dss.pdf [file tau-10-01-66-dss.pdf]

## Data Sharing Statement

|                     |                                                                                                                                                    |                                                                                                                                                                                                                                                                                              |
|---------------------|----------------------------------------------------------------------------------------------------------------------------------------------------|----------------------------------------------------------------------------------------------------------------------------------------------------------------------------------------------------------------------------------------------------------------------------------------------|
| <b>Article Info</b> | <a href="http://dx.doi.org/10.21037/tau-20-850">http://dx.doi.org/10.21037/tau-20-850</a>                                                          |                                                                                                                                                                                                                                                                                              |
| <b>Item</b>         | <b>Question</b>                                                                                                                                    | <b>Authors' Response<br/>(place "-" if not applicable)</b>                                                                                                                                                                                                                                   |
| 1                   | Would you like to share data collected for your study to others?                                                                                   | yes                                                                                                                                                                                                                                                                                          |
| 2                   | If not, would you like to share the reason for your decision?                                                                                      | -                                                                                                                                                                                                                                                                                            |
| 3                   | What data in particular will be shared?                                                                                                            | We can share all data of our population included in the present study and used to perform our statistical analysis in an excel format (eg. For each patient included values of the single variables considered in the statistical analysis: age, PSA, BMI, ISUP, T stage, survival time....) |
| 4                   | Any other documents will be share? Such as study protocol, statistical analysis plan, informed consent form, clinical study report, analytic code. | No                                                                                                                                                                                                                                                                                           |
| 5                   | When will data availability begin?                                                                                                                 | At publication                                                                                                                                                                                                                                                                               |
| 6                   | When will data availability end?                                                                                                                   | They will remain available                                                                                                                                                                                                                                                                   |
| 7                   | To whom will you share the data?                                                                                                                   | Oncologists, urologists, pathologists                                                                                                                                                                                                                                                        |
| 8                   | For what type of analysis or purpose?                                                                                                              | For all analysis of comparison as prognostic factor and survival results                                                                                                                                                                                                                     |
| 9                   | How or where can the data/documents be obtained?                                                                                                   | We can send data in an excel format at publication obtained                                                                                                                                                                                                                                  |
| 10                  | Any other restrictions?                                                                                                                            | No                                                                                                                                                                                                                                                                                           |
